# Supplementary material for: Disrupting the LC3 Interaction Region (LIR) Binding of Selective Autophagy Receptors Sensitizes AML Cell Lines to Cytarabine
Source: PubMed Central journal article supplement (PMC7137635; doi:10.3389/fcell.2020.00208), 2020-03-31

Figure S3

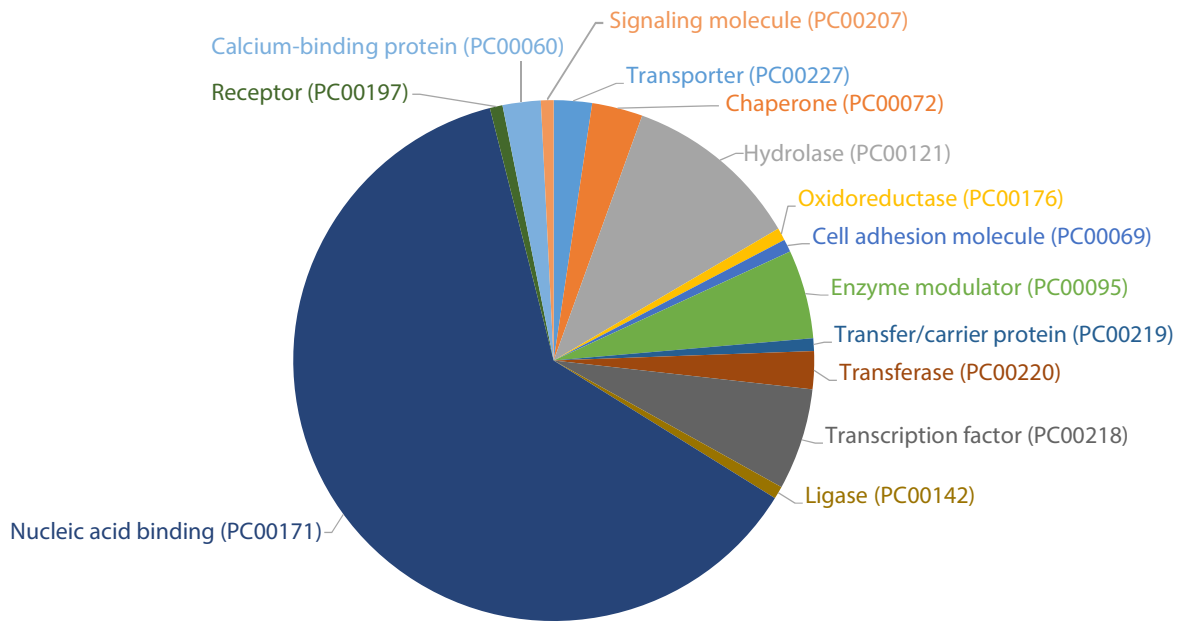

Supplement: Image_3.pdf [file Image_3.pdf]
