# Supplementary material for: Disrupting the LC3 Interaction Region (LIR) Binding of Selective Autophagy Receptors Sensitizes AML Cell Lines to Cytarabine
Source: PubMed Central journal article supplement (PMC7137635; doi:10.3389/fcell.2020.00208), 2020-03-31
Supplement: Table_2.pdf [file Table_2.pdf]

**Table S2:**

| <b>Uniprot ID</b> | <b>Full name</b>                                              | <b>Gene Name</b> |
|-------------------|---------------------------------------------------------------|------------------|
| Q9Y4P1            | Cysteine protease ATG4B                                       | ATG4b            |
| O75143            | Autophagy-related protein 13                                  | ATG13            |
| O60238            | BCL2/adenovirus E1B 19 kDa protein-interacting protein 3-like | BNIP3L           |
| P35222            | Catenin beta-1                                                | CTNNB1           |
| P22681            | E3 ubiquitin-protein ligase CBL                               | Cbl              |
| Q96L12            | Calreticulin-3                                                | CALR3            |
| Q00610            | Clathrin heavy chain 1                                        | CLTC             |
| O14641            | Segment polarity protein dishevelled homolog DVL-2            | DVL2             |
| Q8IVP5            | FUN14 domain-containing protein 1                             | FUNDC1           |
| Q9BQS8            | FYVE and coiled-coil domain-containing protein 1              | FYCO1            |
| Q8TD08            | Mitogen-activated protein kinase 15                           | MAPK15           |
| Q14596            | Next to BRCA1 gene 1 protein                                  | NBR1             |
| Q13137            | Antigen nuclear dot 52 kDa protein                            | NDP52            |
| Q96CV9            | Optineurin                                                    | OPTN             |
| Q13501            | Sequestosome-1                                                | SQSTM1           |
| Q8TDY2            | RB1-inducible coiled-coil protein 1                           | RB1CC1           |
| O95210            | Starch-binding domain-containing protein 1                    | STBD1            |
| Q86VP1            | Tax1-binding protein 1                                        | TAX1BP1          |
| Q92609            | TBC1 domain family member 5                                   | TBC1D5           |
| Q3MII6            | TBC1 domain family member 25                                  | TBC1D25          |
| Q96A56            | Tumor protein p53-inducible nuclear protein 1                 | TP53INP1         |
| Q8IXH6            | Tumor protein p53-inducible nuclear protein 2                 | TP53INP2         |
| O75385            | Serine/threonine-protein kinase ULK1                          | ULK1             |
